# Supplementary material for: Integrating 2D elasticity and elastoplasticity into a multi-stimuli-responsive crystal through phase transitions
Source: Royal Society of Chemistry journal article supplement (doi:10.1039/d3tc02146g), 2023-01-01
Supplement: d3tc02146g15.pdf [file d3tc02146g15.pdf]

## Supporting information

### Integrating 2D elasticity and elastoplasticity into a multi-stimuli-responsive crystal through phase transitions

Yihang Hou<sup>‡a</sup>, Pengpeng Yang<sup>‡b</sup>, Jingjing Zhao<sup>a</sup>, Jinqiu Fu<sup>a</sup>, Chiyi Wang<sup>a</sup>, Yuzhong Shi<sup>a</sup>,  
Wei Zhuang<sup>b</sup>, Keke Zhang<sup>a,\*</sup>, Hanjie Ying<sup>b</sup>

[a] Y. Hou, J. Zhao, J. Fu, C. Wang, Y. Shi and Dr. K. Zhang\*

Biology+ Joint Research Center, School of Chemical Engineering and Technology,  
Zhengzhou University  
Zhengzhou 450001, China

\*E-mail: zhangkeke@zzu.edu.cn

[b] Prof. P. Yang, W. Zhuang and H. Ying

National Engineering Technique Research Center for Biotechnology, State Key  
Laboratory of Materials-Oriented Chemical Engineering, College of Biotechnology and  
Pharmaceutical Engineering, Nanjing Tech University  
Nanjing 211816, China

### Table of Contents

|                                                        |        |
|--------------------------------------------------------|--------|
| <b>1. Experimental Section</b>                         | S2-3   |
| 1.1. Materials and crystallization                     | S2     |
| 1.2. Instrumental methods and calculations             | S2-3   |
| <b>2. Results and Discussion</b>                       | S4-13  |
| 2.1. Crystallographic information                      | S4     |
| 2.2. Molecular structures, torsion angles and overlays | S5     |
| 2.3. Molecular packings and face index measurements    | S6     |
| 2.4. Bending experiment                                | S6-7   |
| 2.5. Multi-stimuli-induced behaviors and SEM images    | S7-9   |
| 2.6. Energy framework calculations                     | S10-12 |
| 2.7. Instructions of the supporting movies             | S13    |
| <b>3. References</b>                                   | S13    |

## 1. Experimental Section

### 1.1. Materials and crystallization

Isonicotinamide (INA) of analytical grade was purchased from Macklin (I811781-500g). Deionized water was prepared in our laboratory. Vacuum silicone grease was purchased from Great Wall (7501). All the reagents were used without further purification.

**Preparation of INA form H single crystals with different habits.** Solvent evaporation method was used to crystallize the INA form **H**.<sup>1</sup> We prepared a series of unsaturated aqueous solutions of INA with different concentrations ranging from 0.05-0.3 g ml<sup>-1</sup> in the beakers at 50 °C, then kept them at room temperature to quickly cool down. Then the clear solution was transferred to the Petri dishes to volatilize the solvent, and INA form **H** crystals with different crystal habits were harvested after one day. The mixture of acicular and rod-like crystals was harvested at 0.1-0.3 g ml<sup>-1</sup>, where the amount of acicular crystals was more at a solution concentration of 0.2-0.3 g ml<sup>-1</sup>, and the crystallization of rod-like crystals was preferred below 0.1 g ml<sup>-1</sup>.

**Preparation of INA polymorphs.** Single crystal-to-single crystal (SC-SC) transitions of the acicular crystals of INA from form **H** to form **I** were actuated by controlling humidity. In the humidity experiment, an acicular crystal of form **H** was placed in the dryer at 0% RH and ambient temperature, then an acicular crystal of form **I** was obtained after three days. In the temperature experiment, an acicular crystal of form **H** was placed on the surface of a temperature-control stage and heated from ambient temperature to 40 °C or 50 °C quickly in atmosphere with about 30% RH, then an acicular crystal of form **I** (40 °C) or form **II** (50 °C) was obtained after three days. The single crystal of form **II** used for structure determination by single crystal X-ray diffraction (SCXRD) was obtained by cooling crystallization. In this experiment, a saturated aqueous solution at 55 °C of INA was cooled to 25 °C at a rate of 5 °C h<sup>-1</sup>, then being maintained at 25 °C for one week, and the crystals of form **II** were harvested ultimately.<sup>2</sup>

### 1.2. Instrumental methods and calculations

**Single crystal X-ray diffraction measurements and structural refinement.** SCXRD measurements were operated on a Rigaku Saturn 70 CCD diffractometer. The crystals of INA were all kept at 113.15 K during data collection. The structure was solved by Olex2 with the ShelXT structure solution program using Intrinsic Phasing and refined with the ShelXL refinement package using Least Squares minimisation.<sup>3-5</sup> The crystallographic data of forms **H**,

**I** and **II** has been deposited with Cambridge Crystallographic Data Centre (CCDC), and signed to CCDC codes 2251153, 2251048 and 2251049, respectively.

**Powder X-ray diffraction measurements.** The powder X-ray diffraction data were collected on a Bruker D8 Advance diffractometer with CuK $\alpha$  radiation ( $\lambda = 1.54060 \text{ \AA}$ ). The measurement  $2\theta$  ranged from 5 to 40° at a scan rate of 10 ° min<sup>-1</sup>. All samples tested were ground into powder.

**Micro-Raman spectroscopy.** The Raman spectra were collected on a Renishaw inVia spectrometer using a 633 nm excitation laser operating at 50 mW. Laser spot on the samples was focused to 2  $\mu\text{m}$ . The measured bent crystals of INA forms were all fixed with tapes at two ends on the glass slides and all samples were single crystals, not powders.

**Scanning electron microscope (SEM).** The electron microscope images of INA crystals were captured using a Thermo Scientific Phenom Pure G6 Desktop SEM. Single crystal samples were deposited on a carbon stripe and sputtered with gold before being introduced into the instrument. The operating voltage was 5 kV during imaging.

**Energy framework calculations.** The energy frameworks of INA forms **H**, **I** and **II** were calculated respectively, constructed from pairwise interaction energies considering radius of 3.8  $\text{\AA}$  between the centroid of INA molecule and another atom of neighboring molecules, based on the B3LYP/6-31G(d, p) level of theory in CrystalExplorer17.5.<sup>6</sup> Thicker cylindrical tubes represent the stronger interactions. The energy cut-off was 5 kJ mol<sup>-1</sup> and tube size was 100.

## 2. Results and Discussion

### 2.1. Crystallographic information

**Table S1.** Crystallographic and structural refinement parameters of INA forms **H**, **I** and **II**.

| Compounds                                              | Form H                                                           | Form I                                                            | Form II                                                             |
|--------------------------------------------------------|------------------------------------------------------------------|-------------------------------------------------------------------|---------------------------------------------------------------------|
| Empirical formula                                      | C <sub>6</sub> H <sub>8</sub> N <sub>2</sub> O <sub>2</sub>      | C <sub>6</sub> H <sub>6</sub> N <sub>2</sub> O                    | C <sub>6</sub> H <sub>6</sub> N <sub>2</sub> O                      |
| CCDC code                                              | 2251153                                                          | 2251048                                                           | 2251049                                                             |
| Formula weight                                         | 140.14                                                           | 122.13                                                            | 122.13                                                              |
| Temperature/K                                          | 113.15                                                           | 113.15                                                            | 113.15                                                              |
| Crystal system                                         | monoclinic                                                       | monoclinic                                                        | monoclinic                                                          |
| Space group                                            | P2 <sub>1</sub> /n                                               | P2 <sub>1</sub> /c                                                | P2 <sub>1</sub> /c                                                  |
| <i>a</i> / Å                                           | 7.4163(7)                                                        | 10.1796(10)                                                       | 15.7376(19)                                                         |
| <i>b</i> / Å                                           | 10.8145(9)                                                       | 5.7328(6)                                                         | 8.0174(7)                                                           |
| <i>c</i> / Å                                           | 16.6663(15)                                                      | 10.0248(9)                                                        | 9.9053(9)                                                           |
| $\alpha$ / °                                           | 90                                                               | 90                                                                | 90                                                                  |
| $\beta$ / °                                            | 93.103(9)                                                        | 98.126(9)                                                         | 105.530(11)                                                         |
| $\gamma$ / °                                           | 90                                                               | 90                                                                | 90                                                                  |
| Volume / Å <sup>3</sup>                                | 1334.7(2)                                                        | 579.15(10)                                                        | 1204.2(2)                                                           |
| Z                                                      | 8                                                                | 4                                                                 | 8                                                                   |
| $\rho_{\text{calc}}$ / g cm <sup>-3</sup>              | 1.395                                                            | 1.401                                                             | 1.347                                                               |
| $\mu$ / mm <sup>-1</sup>                               | 0.107                                                            | 0.1                                                               | 0.096                                                               |
| F (000)                                                | 592                                                              | 256                                                               | 512                                                                 |
| Crystal size / mm <sup>3</sup>                         | 0.13 × 0.1 × 0.08                                                | 0.25 × 0.22 × 0.17                                                | 0.23 × 0.2 × 0.16                                                   |
| Radiation                                              | MoK $\alpha$ ( $\lambda$ = 0.71073)                              | MoK $\alpha$ ( $\lambda$ = 0.71073)                               | MoK $\alpha$ ( $\lambda$ = 0.71073)                                 |
| 2 $\theta$ range for data collection / °               | 4.492 to 52.74                                                   | 4.042 to 52.71                                                    | 5.374 to 56.558                                                     |
| Index ranges                                           | -9 ≤ <i>h</i> ≤ 9,<br>-13 ≤ <i>k</i> ≤ 13,<br>-1 ≤ <i>l</i> ≤ 20 | -12 ≤ <i>h</i> ≤ 12,<br>-7 ≤ <i>k</i> ≤ 7,<br>-12 ≤ <i>l</i> ≤ 12 | -20 ≤ <i>h</i> ≤ 20,<br>-10 ≤ <i>k</i> ≤ 10,<br>-12 ≤ <i>l</i> ≤ 13 |
| Reflections collected                                  | 2727                                                             | 5647                                                              | 11692                                                               |
| Independent reflections                                | 2727                                                             | 1183                                                              | 2981                                                                |
| Data/restraints/parameters                             | 2727/0/188                                                       | 1183/0/83                                                         | 2981/0/164                                                          |
| Goodness-of-fit on F <sup>2</sup>                      | 1.27                                                             | 1.074                                                             | 1.059                                                               |
| Final R indexes [ <i>I</i> >= 2 $\sigma$ ( <i>I</i> )] | R <sub>1</sub> = 0.0770, wR <sub>2</sub> = 0.1522                | R <sub>1</sub> = 0.0466, wR <sub>2</sub> = 0.1139                 | R <sub>1</sub> = 0.0708, wR <sub>2</sub> = 0.1424                   |
| Final R indexes [all data]                             | R <sub>1</sub> = 0.1058, wR <sub>2</sub> = 0.1618                | R <sub>1</sub> = 0.0571, wR <sub>2</sub> = 0.1215                 | R <sub>1</sub> = 0.1248, wR <sub>2</sub> = 0.1696                   |
| Largest diff. peak/hole / e Å <sup>-3</sup>            | 0.30/-0.37                                                       | 0.22/-0.22                                                        | 0.29/-0.23                                                          |

## 2.2. Molecular structures, torsion angles and overlays

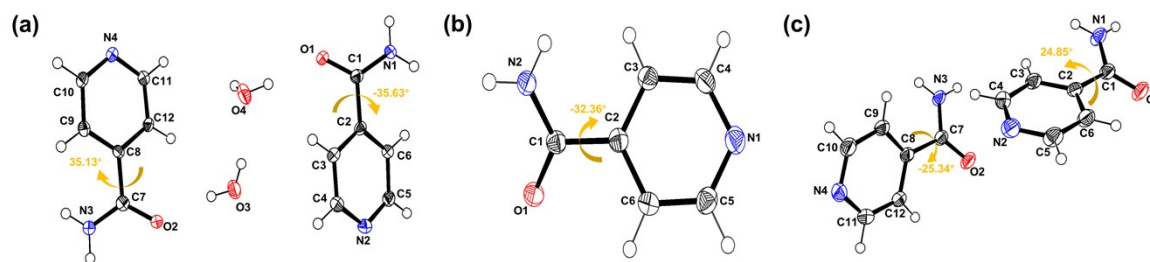

**Figure S1.** Molecular structures with torsion angles of INA (a) forms **H**, (b) **I** and (c) **II**, showing thermal displacement ellipsoids (drawn at the 50% probability level) with atom numbering labels.

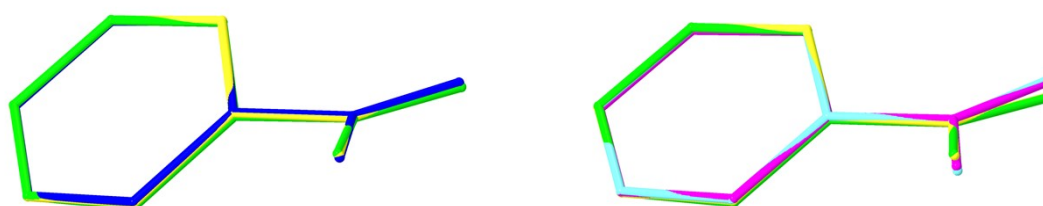

**Figure S2.** Overlays of the conformations in the crystal structures of INA (left) forms **H** and **I**, (right) forms **H** and **II**. The yellow and green conformations represent INA molecules of form **H**, dark blue for form **I**, purple and natter blue for form **II**.

**Table S2.** Torsion Angles of INA forms **H**, **I** and **II**.

| Form H |    |    |     |           | Form I |    |    |    |            | Form II |    |    |     |           |
|--------|----|----|-----|-----------|--------|----|----|----|------------|---------|----|----|-----|-----------|
| A      | B  | C  | D   | Angle / ° | A      | B  | C  | D  | Angle / °  | A       | B  | C  | D   | Angle / ° |
| O1     | C1 | C2 | C3  | -33.2(6)  | O1     | C1 | C2 | C3 | 146.96(17) | O1      | C1 | C2 | C3  | -153.8(2) |
| O1     | C1 | C2 | C6  | 143.9(4)  | O1     | C1 | C2 | C6 | -30.7(2)   | O1      | C1 | C2 | C6  | 24.2(4)   |
| N1     | C1 | C2 | C3  | 147.4(4)  | N2     | C1 | C2 | C3 | -32.3(2)   | N1      | C1 | C2 | C3  | 24.9(4)   |
| N1     | C1 | C2 | C6  | -35.6(6)  | N2     | C1 | C2 | C6 | 150.01(17) | N1      | C1 | C2 | C6  | -157.1(2) |
| O2     | C7 | C8 | C9  | -144.7(4) |        |    |    |    |            | O2      | C7 | C8 | C9  | 153.2(2)  |
| O2     | C7 | C8 | C12 | 34.7(6)   |        |    |    |    |            | O2      | C7 | C8 | C12 | -25.3(4)  |
| N3     | C7 | C8 | C9  | 35.1(6)   |        |    |    |    |            | N3      | C7 | C8 | C9  | -25.3(4)  |
| N3     | C7 | C8 | C12 | -145.5(4) |        |    |    |    |            | N3      | C7 | C8 | C12 | 156.1(2)  |

### 2.3. Molecular packings and face indexing measurements

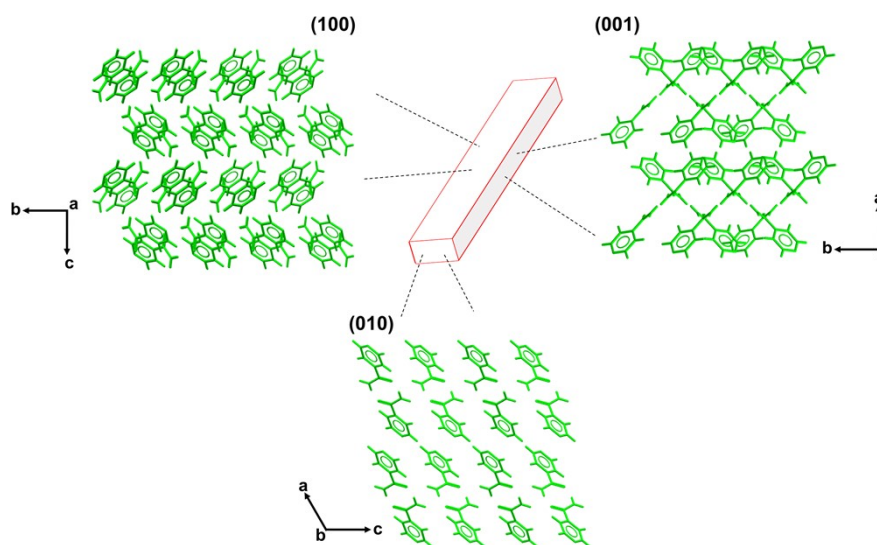

**Figure S3.** Molecular arrangements viewed along the different crystal faces and growth morphologies of the acicular form **I** crystals. The meanings of different colors are the same as those of Figure 3.

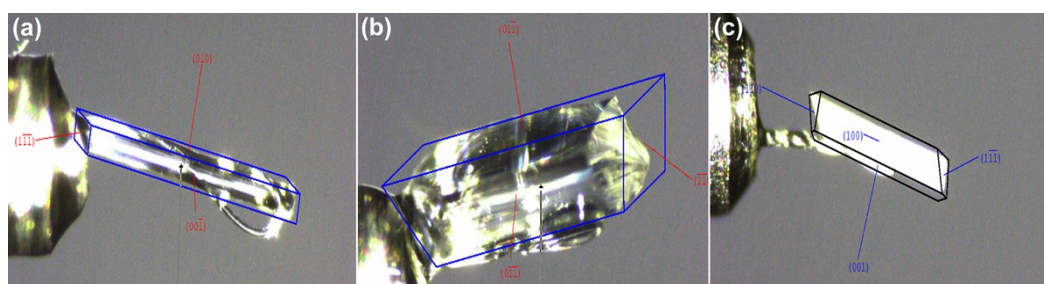

**Figure S4.** Face indexing measurements of the (a) acicular crystal and (b) rod-like crystal of INA form **H**, (c) and acicular crystal of form **I** (obtained at 0% RH).

### 2.4. Bending experiment

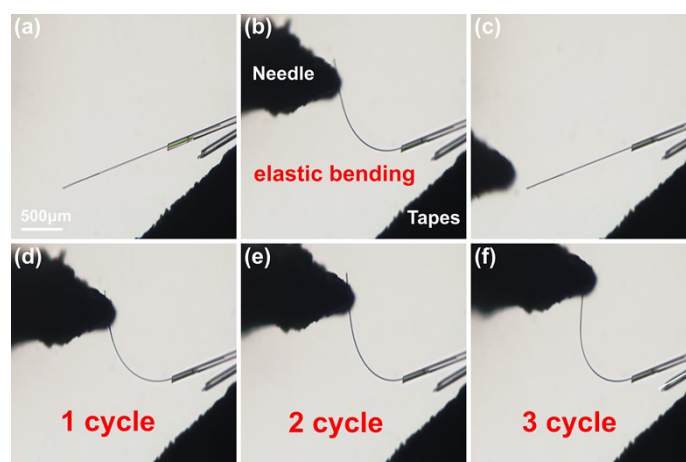

**Figure S5.** Optical microscopic photographs of an acicular single crystal of form **H** undergoing in-plane elastic bending for many times.

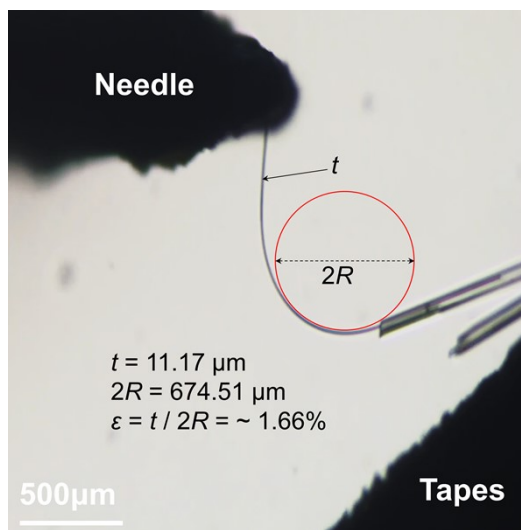

**Figure S6.** Elastic bending strain calculation of the acicular single crystal of INA form **H**.

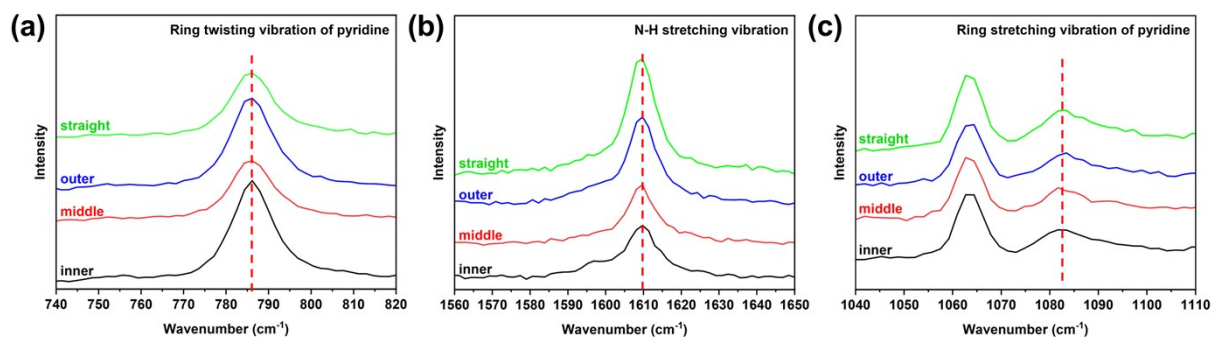

**Figure S7.** Experimental local Raman spectra of initially straight and bent crystals of acicular (a, b) INA form **H** and (c) form **I** (obtained at 0% RH).

## 2.5. Multi-stimuli-induced behaviors and SEM images

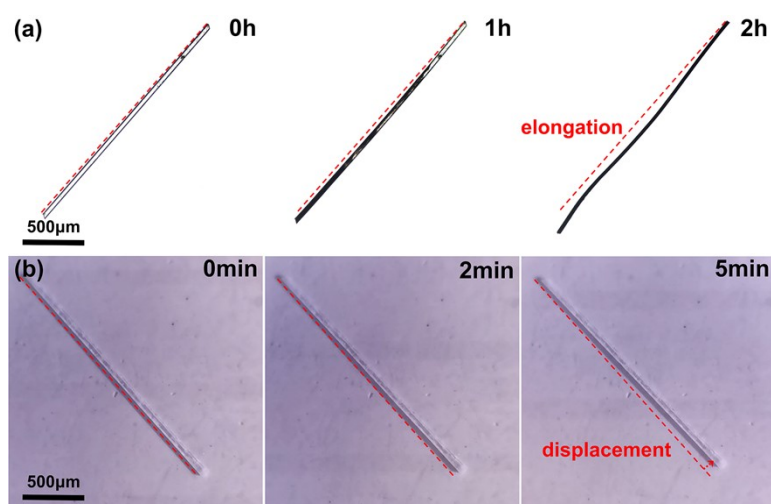

**Figure S8.** The microscopy images showing the phase transition process of (a) acicular form **H**  $\rightarrow$  form **I** at 0% RH accompanied by elongation, and (b) acicular form **H**  $\rightarrow$  form **II** at 50  $^{\circ}\text{C}$  accompanied by displacement.

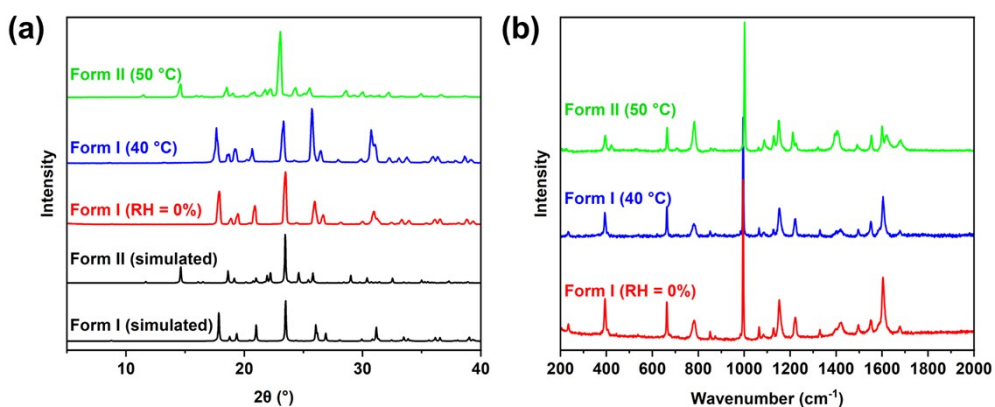

**Figure S9.** (a) PXRD patterns and (b) Raman spectra of form I and form II crystals obtained from phase transitions.

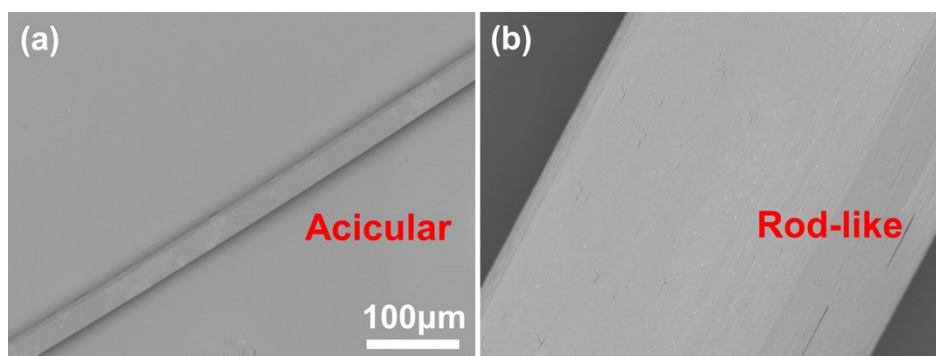

**Figure S10.** The SEM images of an (a) acicular and (b) rod-like crystal of form H.

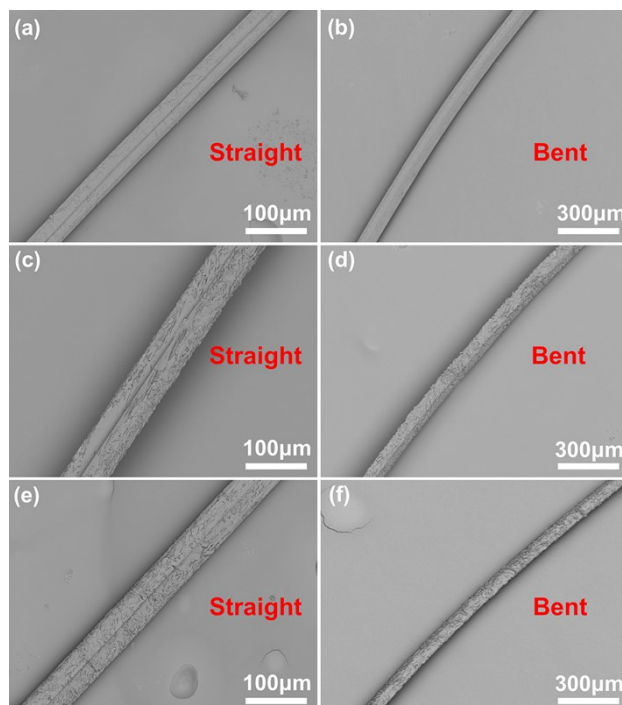

**Figure S11.** The SEM images of form I straight crystals obtained by (a) drying and (c) heating, (e) form II obtained by heating. (b, d, f) According mechanically bent crystals were also shown here.



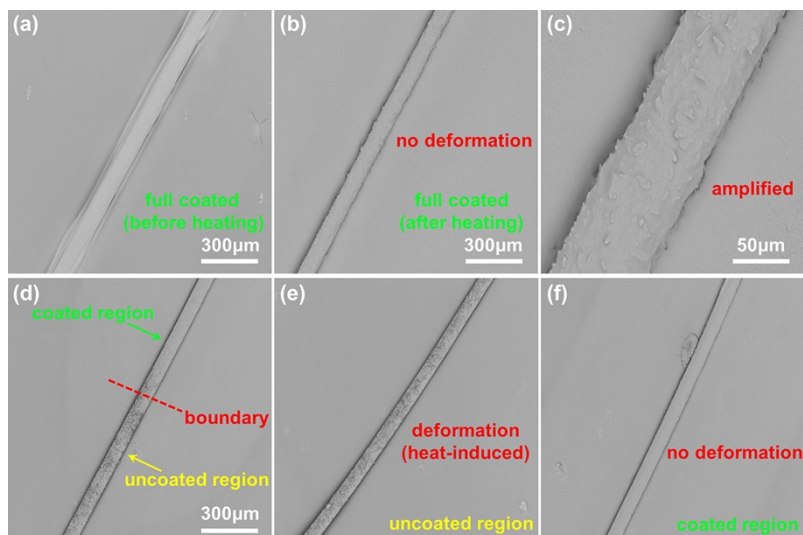

**Figure S12.** The SEM images of acicular form **H** crystals which were fully coated by silicone grease (a) before and (b, c) after heating at 50 °C without any deformation, and (d-f) half coated after heating at 50 °C along with deformation only in the uncoated region.

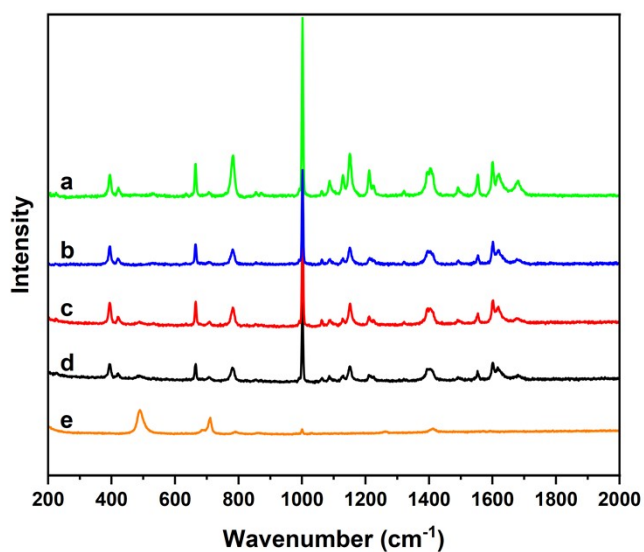

**Figure S13.** The Raman spectra of (a) uncoated and (d) full coated acicular crystals of form **H** upon heating at 50 °C after three days, and half coated crystal upon heating at 50 °C after three days in the case of the laser shining on the (b) exposed uncoated and (c) coated region respectively. (e) The Raman spectra of pure vacuum silicone grease.

## 2.6. Energy framework calculations

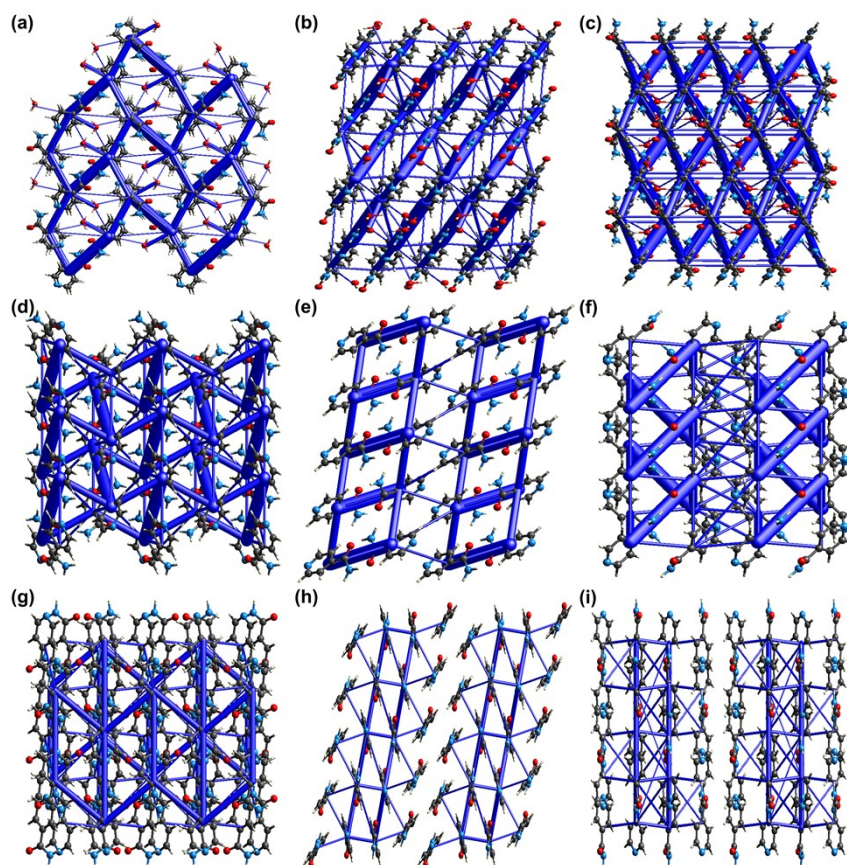

**Figure S14.** Calculated energy frameworks of INA (a-c) forms **H**, (d-f) **I** and (g-i) **II** in the different directions. Thicker tubes represent relatively stronger interactions. Frameworks are shown at an energy cut-off of  $5 \text{ kJ mol}^{-1}$  and tube size of 100.

**Table S3.** Details of interaction energy calculations in CrystalExplorer17.5.**Form H**

|  | N | Symop                 | R    | Electron Density | E_ele | E_pol | E_dis | E_rep | E_tot |
|--|---|-----------------------|------|------------------|-------|-------|-------|-------|-------|
|  | 0 | -                     | 3.77 | B3LYP/6-31G(d,p) | 4.0   | -2.8  | -32.0 | 20.1  | -13.3 |
|  | 0 | -x+1/2, y+1/2, -z+1/2 | 6.43 | B3LYP/6-31G(d,p) | -0.1  | -1.7  | -10.3 | 5.3   | -7.0  |
|  | 1 | -                     | 7.58 | B3LYP/6-31G(d,p) | -75.2 | -16.0 | -11.3 | 60.4  | -63.9 |
|  | 1 | -                     | 3.69 | B3LYP/6-31G(d,p) | 5.3   | -2.2  | -34.0 | 22.3  | -11.8 |
|  | 1 | -                     | 6.50 | B3LYP/6-31G(d,p) | -37.0 | -9.7  | -16.5 | 44.5  | -33.1 |
|  | 0 | -x, -y, -z            | 7.53 | B3LYP/6-31G(d,p) | -8.3  | -1.1  | -5.0  | 0.7   | -13.6 |
|  | 0 | -                     | 7.10 | B3LYP/6-31G(d,p) | 4.1   | -0.4  | -0.9  | 0.1   | 3.3   |
|  | 1 | -                     | 7.96 | B3LYP/6-31G(d,p) | -4.2  | -1.4  | -3.4  | 2.1   | -7.0  |
|  | 1 | -                     | 6.56 | B3LYP/6-31G(d,p) | -38.3 | -9.9  | -15.8 | 46.3  | -33.1 |
|  | 1 | -                     | 8.72 | B3LYP/6-31G(d,p) | -2.5  | -0.5  | -1.4  | 0.1   | -4.1  |
|  | 0 | -                     | 4.10 | B3LYP/6-31G(d,p) | -38.1 | -8.8  | -8.5  | 44.3  | -26.9 |
|  | 0 | -                     | 4.92 | B3LYP/6-31G(d,p) | -5.7  | -1.9  | -5.0  | 7.2   | -7.3  |
|  | 0 | -                     | 4.50 | B3LYP/6-31G(d,p) | 5.2   | -1.1  | -5.2  | 3.1   | 2.1   |
|  | 0 | -                     | 4.49 | B3LYP/6-31G(d,p) | -5.8  | -1.0  | -5.6  | 6.3   | -7.9  |
|  | 0 | -                     | 5.08 | B3LYP/6-31G(d,p) | -5.7  | -1.1  | -4.5  | 4.6   | -7.9  |

## Form I

|  | N | Symop             | R    | Electron Density | E_ele | E_pol | E_dis | E_rep | E_tot |
|--|---|-------------------|------|------------------|-------|-------|-------|-------|-------|
|  | 1 | -x, -y, -z        | 5.17 | B3LYP/6-31G(d,p) | -0.1  | -0.9  | -19.7 | 10.2  | -11.6 |
|  | 2 | -x, y+1/2, -z+1/2 | 7.34 | B3LYP/6-31G(d,p) | -9.0  | -2.4  | -9.1  | 12.9  | -11.3 |
|  | 1 | -x, -y, -z        | 8.00 | B3LYP/6-31G(d,p) | -7.5  | -2.4  | -8.3  | 9.4   | -11.1 |
|  | 0 | -x, -y, -z        | 7.58 | B3LYP/6-31G(d,p) | -71.3 | -15.1 | -11.1 | 58.4  | -60.2 |
|  | 1 | x, y, z           | 5.73 | B3LYP/6-31G(d,p) | -3.3  | -1.3  | -15.6 | 9.0   | -12.5 |
|  | 0 | -x, y+1/2, -z+1/2 | 6.45 | B3LYP/6-31G(d,p) | 4.3   | -1.7  | -6.6  | 1.2   | -1.7  |
|  | 1 | x, -y+1/2, z+1/2  | 5.59 | B3LYP/6-31G(d,p) | -32.7 | -8.6  | -11.3 | 28.6  | -33.1 |
|  | 0 | -x, -y, -z        | 5.38 | B3LYP/6-31G(d,p) | -3.1  | -2.5  | -16.8 | 8.8   | -14.3 |
|  | 1 | x, -y+1/2, z+1/2  | 5.97 | B3LYP/6-31G(d,p) | 0.4   | -0.7  | -11.3 | 8.8   | -4.5  |

## Form II

|  | N | Symop             | R    | Electron Density | E_ele | E_pol | E_dis | E_rep | E_tot |
|--|---|-------------------|------|------------------|-------|-------|-------|-------|-------|
|  | 1 | -                 | 4.85 | B3LYP/6-31G(d,p) | -1.1  | -1.9  | -18.4 | 11.4  | -11.5 |
|  | 0 | x, -y+1/2, z+1/2  | 6.62 | B3LYP/6-31G(d,p) | -2.3  | -0.6  | -10.2 | 7.3   | -7.2  |
|  | 1 | -                 | 5.98 | B3LYP/6-31G(d,p) | -1.6  | -1.7  | -9.6  | 3.4   | -9.2  |
|  | 0 | x, y, z           | 8.02 | B3LYP/6-31G(d,p) | -38.7 | -9.3  | -8.4  | 39.7  | -30.7 |
|  | 1 | -                 | 5.97 | B3LYP/6-31G(d,p) | 4.5   | -1.5  | -14.0 | 9.8   | -2.4  |
|  | 0 | x, -y+1/2, z+1/2  | 6.14 | B3LYP/6-31G(d,p) | -30.7 | -9.0  | -12.2 | 31.4  | -30.3 |
|  | 0 | -x, y+1/2, -z+1/2 | 6.73 | B3LYP/6-31G(d,p) | -5.9  | -2.1  | -8.5  | 6.6   | -11.1 |
|  | 0 | -x, -y, -z        | 3.83 | B3LYP/6-31G(d,p) | 0.6   | -1.0  | -27.5 | 15.4  | -14.5 |
|  | 0 | -x, -y, -z        | 8.53 | B3LYP/6-31G(d,p) | -5.0  | -0.4  | -1.8  | 0.0   | -7.1  |

## 2.7. Instructions of the supporting movies

Movie 1 shows the 2D elastic bending of acicular form **H** crystal.

Movie 5 shows the humidity-induced deformation of acicular form **H** crystal on drying at 0% RH.

Movies 8 shows the temperature-induced displacement of acicular form **H** crystal upon heating at 50 °C.

Movie 12 shows the elastoplasticity of acicular form **I** (obtained at 0% RH) crystals, which represents elastic and plastic bending in the different stage of mechanical bending.

## 3. References

- (1) C. C. Seaton, A. Parkin, C. C. Wilson and N. Blagden, *Cryst. Growth Des.*, 2009, **9**, 47-56.
- (2) N. Fellah, C. J. Zhang, C. Chen, C. T. Hu, B. Kahr, M. D. Ward and A. G. Shtukenberg, *Cryst. Growth Des.*, 2021, **21**, 4713-4724.
- (3) O. V. Dolomanov, L. J. Bourhis, R. J. Gildea, J. A. K. Howard and H. Puschmann, *J. Appl. Crystallogr.*, 2009, **42**, 339-341.
- (4) G. M. Sheldrick, *Acta. Crystallogr. A. Found. Adv.*, 2015, **71**, 3-8.
- (5) G. M. Sheldrick, *Acta. Crystallogr. C. Struct. Chem.*, 2015, **71**, 3-8.
- (6) P. R. Spackman, M. J. Turner, J. J. McKinnon, S. K. Wolff, D. J. Grimwood, D. Jayatilaka and M. A. Spackman, *J. Appl. Crystallogr.*, 2021, **54**, 1006-1011.
